# Supplementary material for: Inflammatory markers are associated with infertility prevalence: a cross-sectional analysis of the NHANES 2013–2020
Source: PubMed Central journal article supplement (PMC10797998; doi:10.1186/s12889-024-17699-4), 2024-01-18
Supplement: 12889_2024_17699_MOESM1_ESM.pdf [file 12889_2024_17699_MOESM1_ESM.pdf]

**A**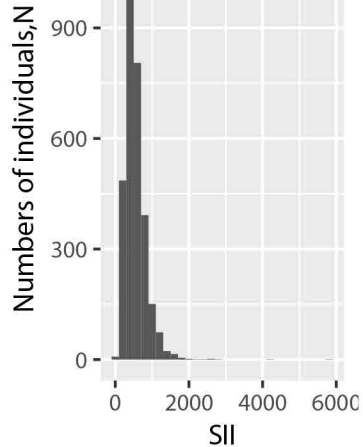**B**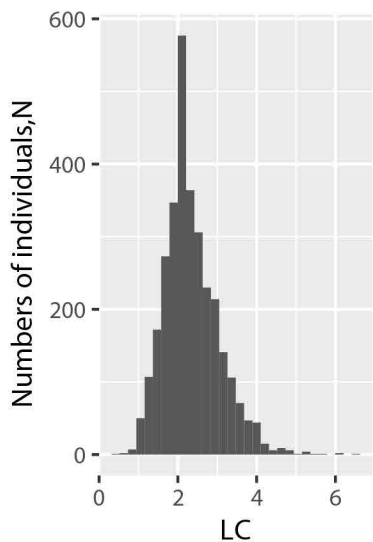**C**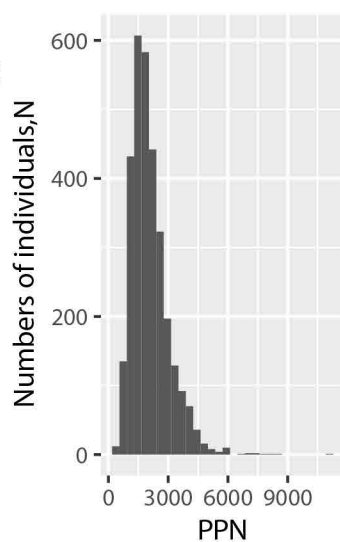**D**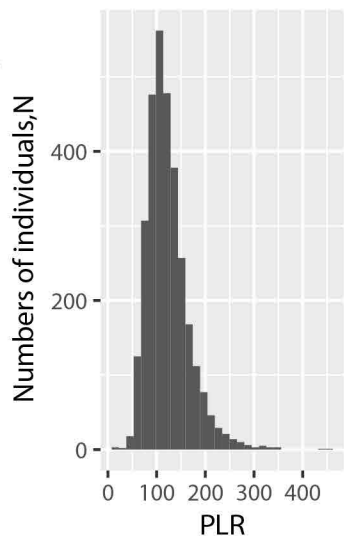**E**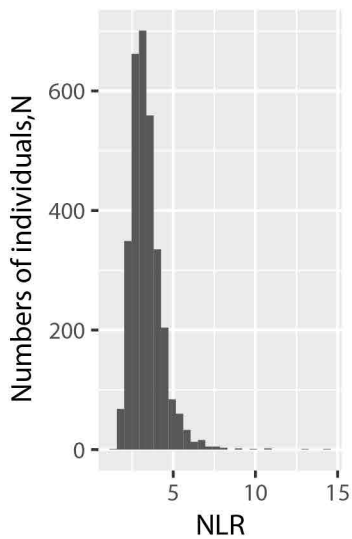**F**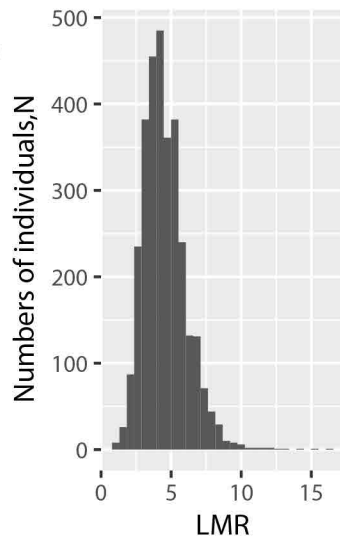

## Supplementary Figure 1 Distribution of inflammatory markers among individuals included.

(A)SII; (B) LC; (C) PPN; (D)PLR; (E) NLR; (F) LMR were measured in  $1 \times 1000$  cells/ $\mu$ L. SII, systemic immune inflammation index; LC, lymphocyte count; PPN, product of platelet and neutrophil count; PLR, platelet to lymphocyte ratio; NLR, neutrophil to lymphocyte ratio; LMR, lymphocyte to monocyte ratio.
