# Supplementary material for: Inflammatory markers are associated with infertility prevalence: a cross-sectional analysis of the NHANES 2013–2020
Source: PubMed Central journal article supplement (PMC10797998; doi:10.1186/s12889-024-17699-4), 2024-01-18
Supplement: 12889_2024_17699_MOESM2_ESM.pdf [file 12889_2024_17699_MOESM2_ESM.pdf]

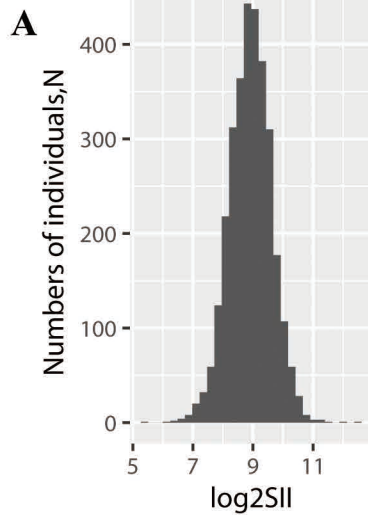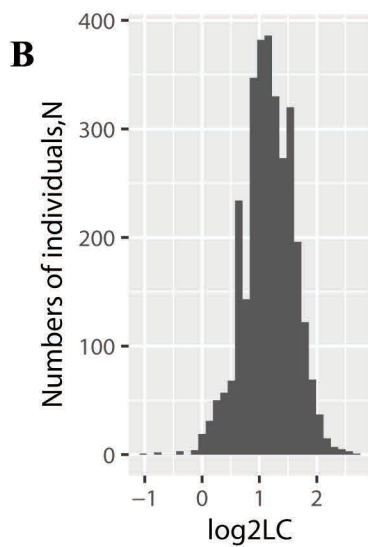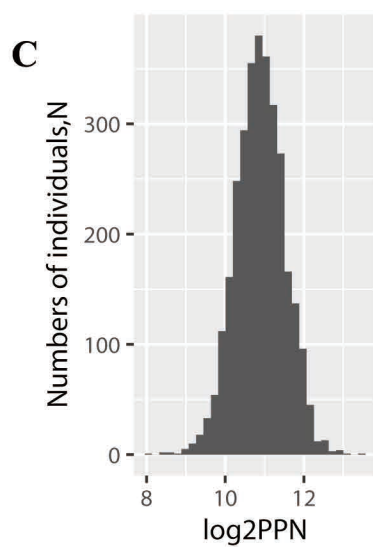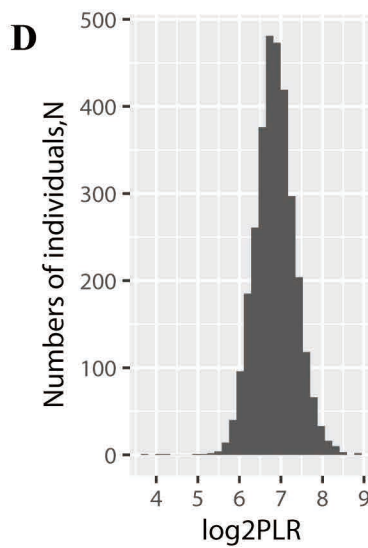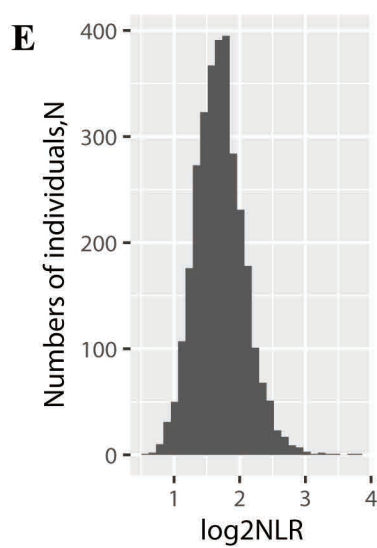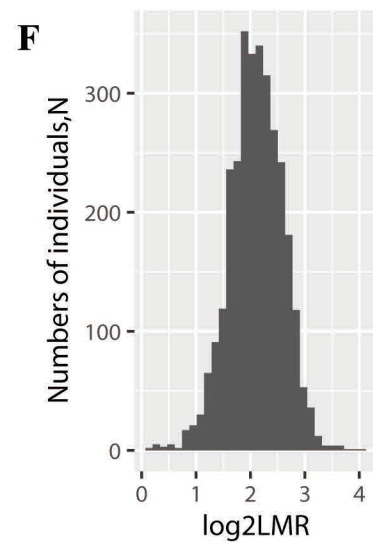

## Supplementary Figure 2 Distribution of log<sub>2</sub>-transformed inflammatory markers among individuals included.

(A) log<sub>2</sub>-transformed SII; (B) log<sub>2</sub>-transformed LC; (C) log<sub>2</sub>-transformed PPN; (D) log<sub>2</sub>-transformed PLR; (E) log<sub>2</sub>-transformed NLR; (F) log<sub>2</sub>-transformed LMR. SII, systemic immune inflammation index; LC, lymphocyte count; PPN, product of platelet and neutrophil count; PLR, platelet to lymphocyte ratio; NLR, neutrophil to lymphocyte ratio; LMR, lymphocyte to monocyte ratio.
